# Supplementary material for: Biomimetic models of [Fe]-hydrogenase featuring a 2-acylphenylthiomethyl-6-R-pyridine (R = H or OMe) ligand
Source: Royal Society of Chemistry journal article supplement (doi:10.1039/d2cc04523k), 2022-01-01
Supplement: d2cc04523k1.pdf [file d2cc04523k1.pdf]

## Supporting Information

### Biomimetic Models of [Fe]-Hydrogenase Featuring a 2-Acylphenylthiomethyl-6-R-pyridine (R = H or OMe) Ligand

Li-Cheng Song,\* Zhen-Qing Zhang, Bei-Bei Liu, Yin-Peng Wang and Shuai Chen

#### Contents:

|                                                                                                                                                                  |    |
|------------------------------------------------------------------------------------------------------------------------------------------------------------------|----|
| 1. Synthesis and Spectroscopic Characterization Data .....                                                                                                       | 3  |
| 1.1 General comments .....                                                                                                                                       | 3  |
| 1.2 Synthesis and characterization data of precursors 1a,b, 2a,b and models 3a,b.....                                                                            | 3  |
| 1.2.1 2-HO <sub>2</sub> CC <sub>6</sub> H <sub>4</sub> SCH <sub>2</sub> C <sub>5</sub> H <sub>4</sub> N (1a) .....                                               | 3  |
| 1.2.2 2-HO <sub>2</sub> CC <sub>6</sub> H <sub>4</sub> SCH <sub>2</sub> -6-MeOC <sub>5</sub> H <sub>3</sub> N (1b).....                                          | 4  |
| 1.2.3 [2-ClC(O)C <sub>6</sub> H <sub>4</sub> SCH <sub>2</sub> C <sub>5</sub> H <sub>4</sub> N]·HCl (2a) .....                                                    | 5  |
| 1.2.4 [2-ClC(O)C <sub>6</sub> H <sub>4</sub> SCH <sub>2</sub> -6-MeOC <sub>5</sub> H <sub>3</sub> N]·HCl (2b).....                                               | 5  |
| 1.2.5 $\eta^3$ -[2-C(O)C <sub>6</sub> H <sub>4</sub> SCH <sub>2</sub> C <sub>5</sub> H <sub>4</sub> N]Fe(CO) <sub>2</sub> I (3a) .....                           | 5  |
| 1.2.6 $\eta^3$ -[2-C(O)C <sub>6</sub> H <sub>4</sub> SCH <sub>2</sub> -6-MeOC <sub>5</sub> H <sub>3</sub> N]Fe(CO) <sub>2</sub> I (3b).....                      | 6  |
| 1.3 IR and <sup>1</sup> H ( <sup>13</sup> C) NMR spectra of models 3a,b (Figures S1–S6) .....                                                                    | 7  |
| 2. Experiments for H <sub>2</sub> Activation and Hydride Transfer Reactions .....                                                                                | 10 |
| 2.1 Product Im-H isolated from reaction of ImBF <sub>4</sub> with H <sub>2</sub> catalyzed by model 3a or 3b<br>(Figure S7) .....                                | 10 |
| 2.2 Reaction of ImBF <sub>4</sub> with H <sub>2</sub> catalyzed by model 3a or 3b and the <i>in situ</i> <sup>1</sup> H NMR spectra<br>(Figures S8 and S9) ..... | 11 |

|                                                                                                                                                                                                                                                                                                                               |    |
|-------------------------------------------------------------------------------------------------------------------------------------------------------------------------------------------------------------------------------------------------------------------------------------------------------------------------------|----|
| 3. Experiments for D <sub>2</sub> Activation and Deuteride Transfer Reactions .....                                                                                                                                                                                                                                           | 13 |
| 3.1 Product Im-D isolated from reaction of ImBF <sub>4</sub> with D <sub>2</sub> catalyzed by model 3a or 3b .....                                                                                                                                                                                                            | 13 |
| 3.2 Reaction of ImBF <sub>4</sub> with D <sub>2</sub> catalyzed by model 3a or 3b and the <i>in situ</i> <sup>2</sup> H NMR spectra<br>(Figures S10 and S11) .....                                                                                                                                                            | 14 |
| 4. <i>In situ</i> IR and <sup>1</sup> H NMR Spectra of the 5-Coordinate Intermediate { $\eta^3$ -[2-<br>C(O)C <sub>6</sub> H <sub>4</sub> SCH <sub>2</sub> -6-RC <sub>5</sub> H <sub>3</sub> N]Fe(CO) <sub>2</sub> } <sup>+</sup> (M <sub>3</sub> , R = H) Suggested in the Mechanistic Pathway<br>(Figures S12 and S13)..... | 16 |
| 5. <i>In situ</i> IR and <sup>1</sup> H NMR Spectra of the Fe–H Intermediate $\eta^3$ -[2-C(O)C <sub>6</sub> H <sub>4</sub> SCH <sub>2</sub> -6-<br>RC <sub>5</sub> H <sub>3</sub> N]Fe(CO) <sub>2</sub> H (M <sub>5</sub> , R = H) Suggested in the Mechanistic Pathway (Figure S14 and<br>Figure 5).....                    | 18 |
| 6. X-Ray Crystal Structure .....                                                                                                                                                                                                                                                                                              | 20 |
| 6.1 Crystal structure determinations of models 3a,b.....                                                                                                                                                                                                                                                                      | 20 |
| 6.2 Crystal data and structure refinement details for models 3a,b (Table S1) .....                                                                                                                                                                                                                                            | 21 |
| 7. References.....                                                                                                                                                                                                                                                                                                            | 22 |

## 1. Synthesis and Spectroscopic Characterization Data

### 1.1 General comments

All reactions were carried out using standard Schlenk and vacuum-line techniques under an atmosphere of highly purified nitrogen or argon.  $\text{Na}_2\text{Fe}(\text{CO})_4 \cdot (1,4\text{-dioxane})_{1.5}$  must be kept under a dry inert atmosphere at all times since it is very pyrophoric. MeCN,  $\text{CH}_2\text{Cl}_2$ ,  $\text{Et}_3\text{N}$  were purified by distillation under  $\text{N}_2$  from  $\text{CaH}_2$ . Tetrahydrofuran (THF) and *n*-hexane were distilled from Na/benzophenone ketyl under nitrogen. Trifluoroacetic acid, iodine, thionyl chloride, *p*- $\text{MeC}_6\text{H}_4\text{SO}_2\text{Cl}$  (TsCl),  $\text{AgBF}_4$ , 2-HOCH<sub>2</sub>-6-MeOC<sub>5</sub>H<sub>3</sub>N, H<sub>2</sub> and D<sub>2</sub> were available commercially and used as received. Disodium thiosalicylate,<sup>1</sup> 1,3-diphenylimidazolium tetrafluoroborate ( $\text{ImBF}_4$ ),<sup>2</sup>  $\text{Na}_2\text{Fe}(\text{CO})_4 \cdot (1,4\text{-dioxane})_{1.5}$ ,<sup>3</sup> 2-TsOCH<sub>2</sub>C<sub>5</sub>H<sub>4</sub>N,<sup>4</sup> were prepared according to the published methods. IR spectra were recorded on a Bruker Vector 22 or Bruker Tensor 27 FT-IR infrared spectrophotometer, while <sup>1</sup>H, <sup>2</sup>H and <sup>13</sup>C{<sup>1</sup>H} NMR spectra were obtained on a Bruker Avance 400 NMR and 600 NMR spectrometers, respectively. Elemental analyses were performed on an Elementar Vario EL analyzer. Melting points were determined on an SGW X-4 microscopic melting point apparatus and are uncorrected.

### 1.2 Synthesis and characterization data of precursors 1a,b, 2a,b and models 3a,b

#### 1.2.1 2-HO<sub>2</sub>CC<sub>6</sub>H<sub>4</sub>SCH<sub>2</sub>C<sub>5</sub>H<sub>4</sub>N (1a)

To a stirred solution of 2-TsOCH<sub>2</sub>C<sub>5</sub>H<sub>4</sub>N (2.63 g, 10.0 mmol) in THF (50 mL) was added disodium thiosalicylate (1.98 g, 10.0 mmol) and then the mixture was stirred at room temperature for 6 h. After trifluoroacetic acid (0.74 mL, 10.0 mmol) was added and the new mixture was stirred at this temperature for 0.5 h, volatiles were removed at reduced pressure and then water (100 mL) was added to the resulting residue to give a white suspension. The suspension was extracted with  $\text{CH}_2\text{Cl}_2$  (3×50 mL) and then the combined extracts were dried over anhydrous  $\text{MgSO}_4$ . Removal of  $\text{MgSO}_4$  and  $\text{CH}_2\text{Cl}_2$  produced **1a** (2.20 g, 90%) as a white solid. M.p. 179 °C (dec); Anal. Calcd. for  $\text{C}_{13}\text{H}_{11}\text{NO}_2\text{S}$ : C, 63.65; H, 4.52; N, 5.71. Found: C, 63.45; H, 4.76; N, 5.75. <sup>1</sup>H NMR

(400 MHz, DMSO-*d*<sub>6</sub>):  $\delta$  4.33 (s, 2H, CH<sub>2</sub>), 7.18–8.52 (m, 8H, C<sub>5</sub>H<sub>4</sub>N, C<sub>6</sub>H<sub>4</sub>), 13.13 (s, 1H, CO<sub>2</sub>H) ppm. <sup>13</sup>C{<sup>1</sup>H} NMR (100 MHz, DMSO-*d*<sub>6</sub>):  $\delta$  38.3 (s, CH<sub>2</sub>), 122.8, 123.8, 124.5, 126.2, 128.2, 131.4, 132.8, 137.4, 141.4, 149.5, 157.6 (11s, C<sub>5</sub>H<sub>4</sub>N, C<sub>6</sub>H<sub>4</sub>), 167.9 (s, C=O) ppm. IR (KBr disk):  $\nu_{\text{C=O}}$  1685 (s) cm<sup>-1</sup>.

### 1.2.2 2-HO<sub>2</sub>CC<sub>6</sub>H<sub>4</sub>SCH<sub>2</sub>-6-MeOC<sub>5</sub>H<sub>3</sub>N (**1b**)

#### (i) 2-TsOCH<sub>2</sub>-6-MeOC<sub>5</sub>H<sub>3</sub>N

The stirred mixture consisting of 2-HOCH<sub>2</sub>-6-MeOC<sub>5</sub>H<sub>3</sub>N (0.557 g, 4.0 mmol) in THF (15 mL) and NaOH (1.20 g, 30.0 mmol) in water (15 mL) was cooled to 0 °C and then *p*-toluenesulfonyl chloride (1.14 g, 6.0 mmol) was added. The new mixture was warmed to room temperature and stirred at this temperature for 5 h. To the resulting mixture was added water (30 mL) and then the aqueous solution was extracted with CH<sub>2</sub>Cl<sub>2</sub> (3×30 mL). After the combined extracts were washed with water (2×50 mL) and dried over anhydrous Na<sub>2</sub>SO<sub>4</sub>, removal of Na<sub>2</sub>SO<sub>4</sub> and CH<sub>2</sub>Cl<sub>2</sub> afforded **2-TsOCH<sub>2</sub>-6-MeOC<sub>5</sub>H<sub>3</sub>N** (0.610 g, 52%) as a yellow solid. M.p. 73–74 °C; Anal. Calcd. for C<sub>14</sub>H<sub>15</sub>NO<sub>4</sub>S: C, 57.32; H, 5.15; N, 4.78. Found: C, 57.33; H, 5.14; N, 4.78. <sup>1</sup>H NMR (400 MHz, CDCl<sub>3</sub>):  $\delta$  2.44 (s, 3H, CH<sub>3</sub>C<sub>6</sub>H<sub>4</sub>), 3.83 (s, 3H, CH<sub>3</sub>O), 5.03 (s, 2H, CH<sub>2</sub>), 6.63–7.84 (m, 7H, C<sub>5</sub>H<sub>3</sub>N, C<sub>6</sub>H<sub>4</sub>) ppm. <sup>13</sup>C{<sup>1</sup>H} NMR (100 MHz, CDCl<sub>3</sub>):  $\delta$  21.7 (s, CH<sub>3</sub>C<sub>6</sub>H<sub>4</sub>), 53.4 (s, CH<sub>3</sub>O), 71.6 (s, CH<sub>2</sub>), 110.7, 114.5, 128.1, 129.9, 133.1, 139.2, 144.9, 151.1, 163.7 (9s, C<sub>5</sub>H<sub>3</sub>N, C<sub>6</sub>H<sub>4</sub>), ppm. IR (KBr disk):  $\nu$  1321(m), 1176 (m), 753 (s) cm<sup>-1</sup>.

#### (ii) 2-HO<sub>2</sub>CC<sub>6</sub>H<sub>4</sub>SCH<sub>2</sub>-6-MeOC<sub>5</sub>H<sub>3</sub>N (**1b**)

The same procedure was followed as preparation of **1a**, except that 2-TsOCH<sub>2</sub>-6-MeOC<sub>5</sub>H<sub>3</sub>N (2.94 g, 10.0 mmol) was used in place of 2-TsOCH<sub>2</sub>C<sub>5</sub>H<sub>4</sub>N. **1b** (1.55 g, 56%) was obtained as a white solid. M.p. 164–165 °C; Anal. Calcd. for C<sub>14</sub>H<sub>13</sub>NO<sub>3</sub>S: C, 61.08; H, 4.76; N, 5.09. Found: C, 60.73; H, 4.76; N, 5.08. <sup>1</sup>H NMR (400 MHz, DMSO-*d*<sub>6</sub>):  $\delta$  3.84 (s, 3H, CH<sub>3</sub>O), 4.23 (s, 2H, CH<sub>2</sub>), 6.69–7.89 (m, 7H, C<sub>5</sub>H<sub>3</sub>N, C<sub>6</sub>H<sub>4</sub>), 13.04 (s, 1H, CO<sub>2</sub>H) ppm. <sup>13</sup>C{<sup>1</sup>H} NMR (100 MHz, DMSO-*d*<sub>6</sub>):  $\delta$  37.4 (s, CH<sub>2</sub>), 53.0

(CH<sub>3</sub>O), 108.8, 116.1, 124.0, 126.0, 127.8, 130.9, 132.3, 139.7, 140.9, 154.9, 163.0 (11s, C<sub>5</sub>H<sub>3</sub>N, C<sub>6</sub>H<sub>4</sub>), 167.4 (s, C=O) ppm. IR (KBr disk):  $\nu_{\text{C=O}}$  1672 (s) cm<sup>-1</sup>.

### 1.2.3 [2-ClC(O)C<sub>6</sub>H<sub>4</sub>SCH<sub>2</sub>C<sub>5</sub>H<sub>4</sub>N]·HCl (**2a**)

To a stirred solution of **1a** (1.23 g, 5.0 mmol) in CH<sub>2</sub>Cl<sub>2</sub> (30 mL) was slowly added thionyl chloride (0.73 mL, 10.0 mmol) and then the mixture was refluxed for 4 h. Removal of volatiles at reduced pressure gave rise to **2a** (1.43 g, 95%) as a pale yellow solid. M.p. 150–151 °C; Anal. Calcd. for C<sub>13</sub>H<sub>11</sub>Cl<sub>2</sub>NOS: C, 52.01; H, 3.69; N 4.67. Found: C, 51.96; H, 3.81; N, 4.56. <sup>1</sup>H NMR (400 MHz, CDCl<sub>3</sub>):  $\delta$  4.86 (s, 2H, CH<sub>2</sub>), 7.30–8.63 (m, 8H, C<sub>5</sub>H<sub>4</sub>N, C<sub>6</sub>H<sub>4</sub>) ppm. <sup>13</sup>C{<sup>1</sup>H} NMR (100 MHz, CDCl<sub>3</sub>):  $\delta$  33.0 (s, CH<sub>2</sub>), 125.3, 126.3, 127.4, 127.6, 131.3, 135.3, 135.5, 140.8, 145.4, 154.1 (10s, C<sub>5</sub>H<sub>4</sub>N, C<sub>6</sub>H<sub>4</sub>), 167.1 (s, C=O) ppm. IR (KBr disk):  $\nu_{\text{C=O}}$  1750 (s) cm<sup>-1</sup>.

### 1.2.4 [2-ClC(O)C<sub>6</sub>H<sub>4</sub>SCH<sub>2</sub>-6-MeOC<sub>5</sub>H<sub>3</sub>N]·HCl (**2b**)

The same procedure was followed as preparation of **2a**, except that **1b** (1.38 g, 5.0 mmol) was utilized instead of **1a**. **2b** (1.62 g, 98%) was obtained as a pale yellow solid. M.p. 96–97 °C; Anal. Calcd. for C<sub>14</sub>H<sub>13</sub>Cl<sub>2</sub>NO<sub>2</sub>S: C, 50.92; H, 3.97; N, 4.24. Found: C, 51.29; H, 3.67; N, 4.48. <sup>1</sup>H NMR (400 MHz, CDCl<sub>3</sub>):  $\delta$  4.05 (s, 3H, CH<sub>3</sub>O), 4.47 (s, 2H, CH<sub>2</sub>), 6.80–8.33 (m, 7H, C<sub>5</sub>H<sub>3</sub>N, C<sub>6</sub>H<sub>4</sub>) ppm. <sup>13</sup>C{<sup>1</sup>H} NMR (100 MHz, CDCl<sub>3</sub>):  $\delta$  36.8 (s, CH<sub>2</sub>), 55.2 (s, CH<sub>3</sub>O), 109.2, 116.5, 124.8, 126.1, 126.7, 128.9, 130.1, 134.6, 135.2, 141.8, 142.8, 153.4, 162.9 (13s, C<sub>5</sub>H<sub>3</sub>N, C<sub>6</sub>H<sub>4</sub>), 166.6 (s, C=O) ppm. IR (KBr disk):  $\nu_{\text{C=O}}$  1722 (s) cm<sup>-1</sup>.

### 1.2.5 $\eta^3$ -[2-C(O)C<sub>6</sub>H<sub>4</sub>SCH<sub>2</sub>C<sub>5</sub>H<sub>4</sub>N]Fe(CO)<sub>2</sub>I (**3a**)

At room temperature, Et<sub>3</sub>N (139  $\mu$ L, 1.0 mmol) was added to a suspension of **2a** (0.300 g, 1.0 mmol) in THF (10 mL) and then the mixture was sonicated for 2 min. After the insoluble [Et<sub>3</sub>NH]Cl salt was removed by centrifugation, the resulting solution was added dropwise to a stirred suspension of Na<sub>2</sub>Fe(CO)<sub>4</sub>·(1,4-dioxane)<sub>1.5</sub> (0.346 g, 1.0 mmol) in MeCN (10 mL) at –78 °C. The resulting mixture was warmed slowly to 0 °C and stirred at this temperature for 0.5 h. After the mixture was cooled to –30 °C, I<sub>2</sub> (0.254 g, 1.0 mmol) was added. The new mixture was warmed to room temperature and

stirred at this temperature for 5 h. Solvent was removed at reduced pressure and the residue was subjected to column chromatography on silica gel. Elution with CH<sub>2</sub>Cl<sub>2</sub>/acetone (v/v = 10:1) developed a yellow band, from which **3a** (0.252 g, 54%) was obtained as a yellow solid. M.p. 132 °C (dec); Anal. Calcd. for C<sub>15</sub>H<sub>10</sub>FeINO<sub>3</sub>S: C, 38.57; H, 2.16; N, 3.00. Found: C, 38.53; H, 2.35; N, 2.87. <sup>1</sup>H NMR (400 MHz, CDCl<sub>3</sub>): δ 4.52, 5.26 (dd, *J* = 16.0 Hz, 2H, CH<sub>2</sub>), 7.17–9.01 (m, 8H, C<sub>5</sub>H<sub>4</sub>N, C<sub>6</sub>H<sub>4</sub>) ppm. <sup>13</sup>C{<sup>1</sup>H} NMR (100 MHz, CDCl<sub>3</sub>): δ 51.3 (s, CH<sub>2</sub>), 122.6, 123.9, 124.8, 131.1, 131.2, 133.4, 137.8, 138.6, 147.8, 153.7, 158.8 (11s, C<sub>5</sub>H<sub>4</sub>N, C<sub>6</sub>H<sub>4</sub>), 209.3, 210.6 (2s, C≡O), 262.0 (s, FeC=O) ppm. IR (KBr disk): ν<sub>C=O</sub> 2033 (vs), 1979 (vs); ν<sub>FeC=O</sub> 1626 (s) cm<sup>-1</sup>.

### 1.2.6 η<sup>3</sup>-[2-C(O)C<sub>6</sub>H<sub>4</sub>SCH<sub>2</sub>-6-MeOC<sub>5</sub>H<sub>3</sub>N]Fe(CO)<sub>2</sub>I (**3b**)

The same procedure was followed as preparation of complex **3a**, except that **2b** (0.330 g, 1.0 mmol) was employed in place of **2a**. Elution with CH<sub>2</sub>Cl<sub>2</sub>/acetone (v/v = 40:1) developed a yellow band, from which **3a** (0.250 g, 50%) was obtained as a yellow solid. M.p. 132 °C (dec); Anal. Calcd. for C<sub>16</sub>H<sub>12</sub>FeINO<sub>4</sub>S: C, 38.66; H, 2.43; N, 2.82. Found: C, 38.94; H, 2.56; N, 2.63. <sup>1</sup>H NMR (400 MHz, CDCl<sub>3</sub>): δ 4.09 (s, 3H, CH<sub>3</sub>O), 4.63, 5.34 (dd, *J* = 16.0 Hz, 2H, CH<sub>2</sub>), 6.64–7.92 (m, 7H, C<sub>5</sub>H<sub>3</sub>N, C<sub>6</sub>H<sub>4</sub>) ppm. <sup>13</sup>C{<sup>1</sup>H} NMR (100 MHz, CDCl<sub>3</sub>): δ 50.9 (s, CH<sub>2</sub>), 56.6 (s, CH<sub>3</sub>O), 105.6, 116.3, 122.3, 130.6, 130.7, 132.9, 137.5, 141.0, 148.0, 157.7, 166.1 (11s, C<sub>5</sub>H<sub>3</sub>N, C<sub>6</sub>H<sub>4</sub>), 208.4, 212.0 (2s, C≡O), 259.8 (s, FeC=O) ppm. IR (KBr disk): ν<sub>C=O</sub> 2033 (vs), 1975 (vs); ν<sub>FeC=O</sub> 1626 (s) cm<sup>-1</sup>.

### 1.3 IR and $^1\text{H}$ ( $^{13}\text{C}$ ) NMR spectra of models 3a,b

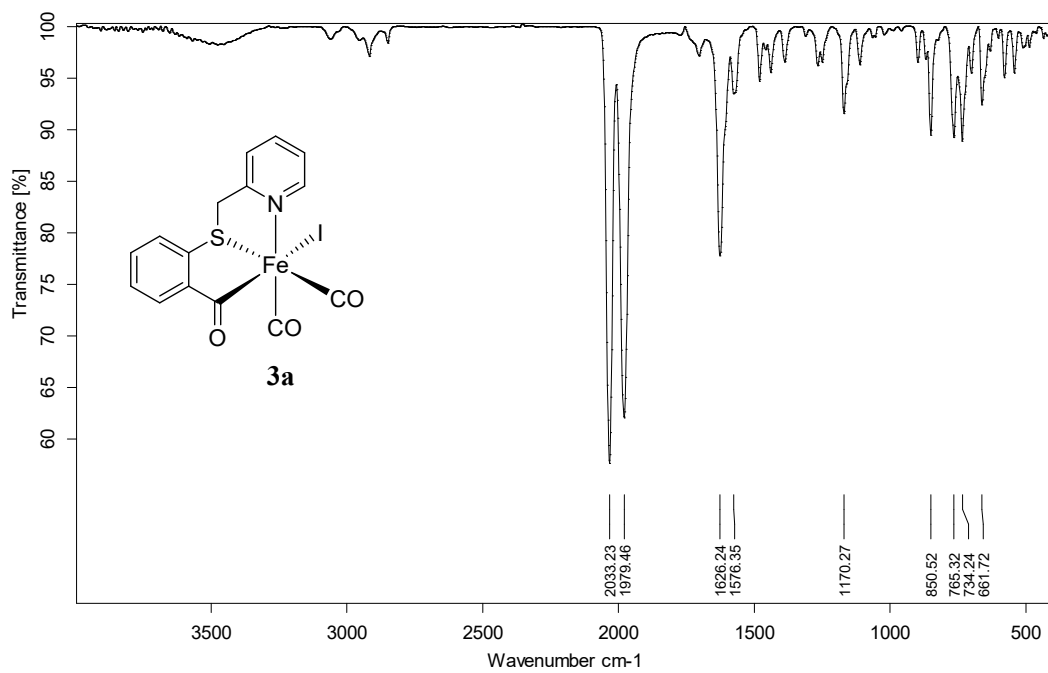

Figure S1. IR spectrum of model 3a.

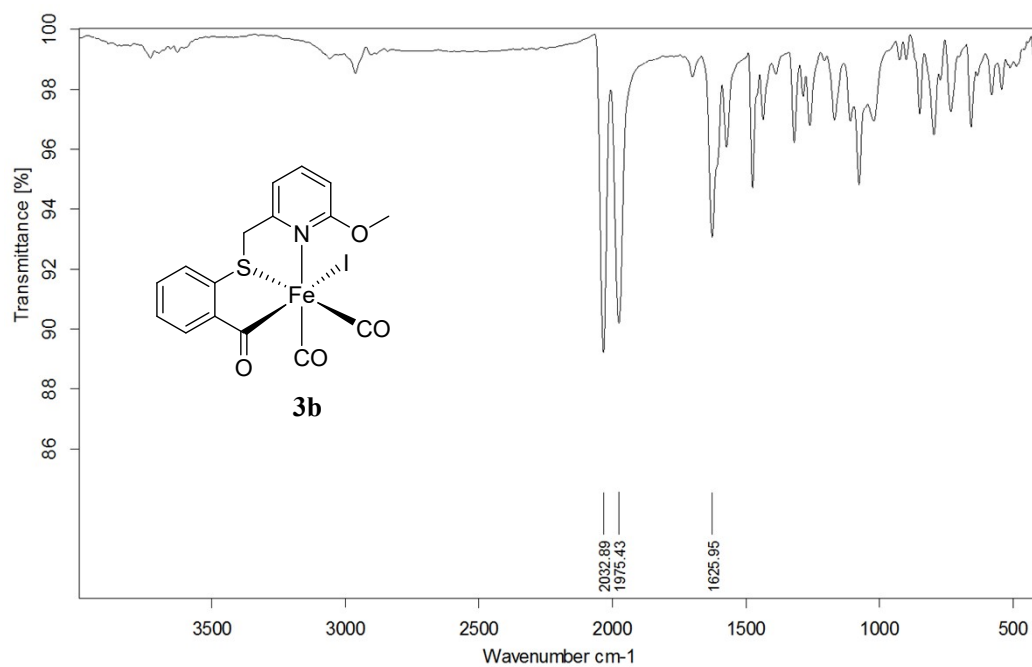

Figure S2. IR spectrum of model 3b.

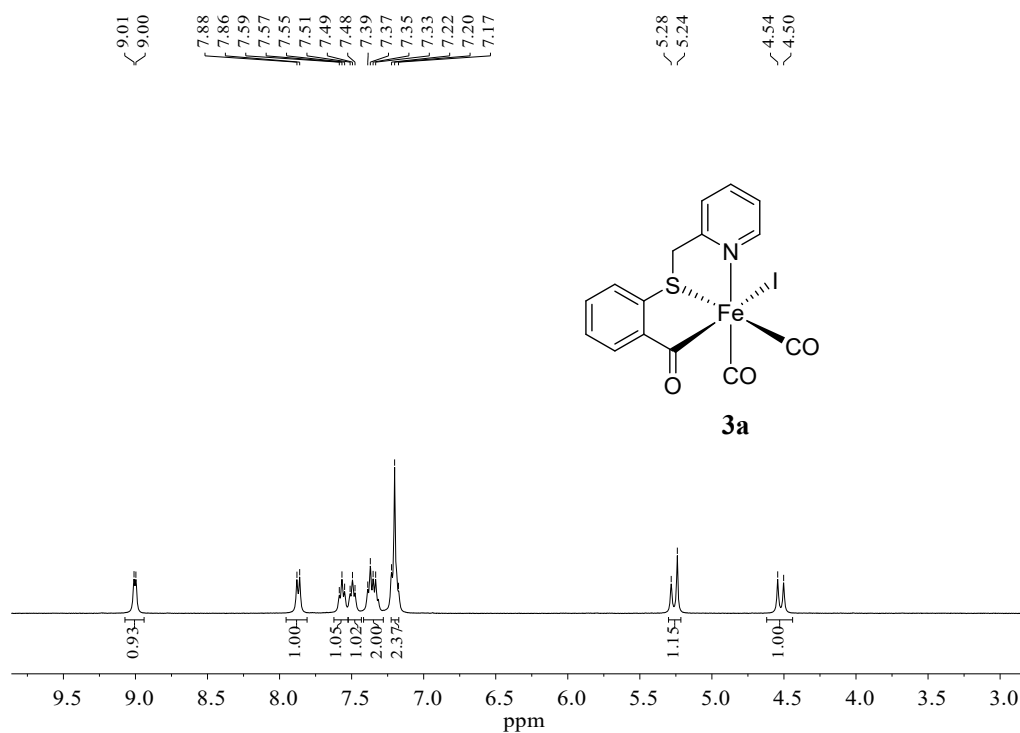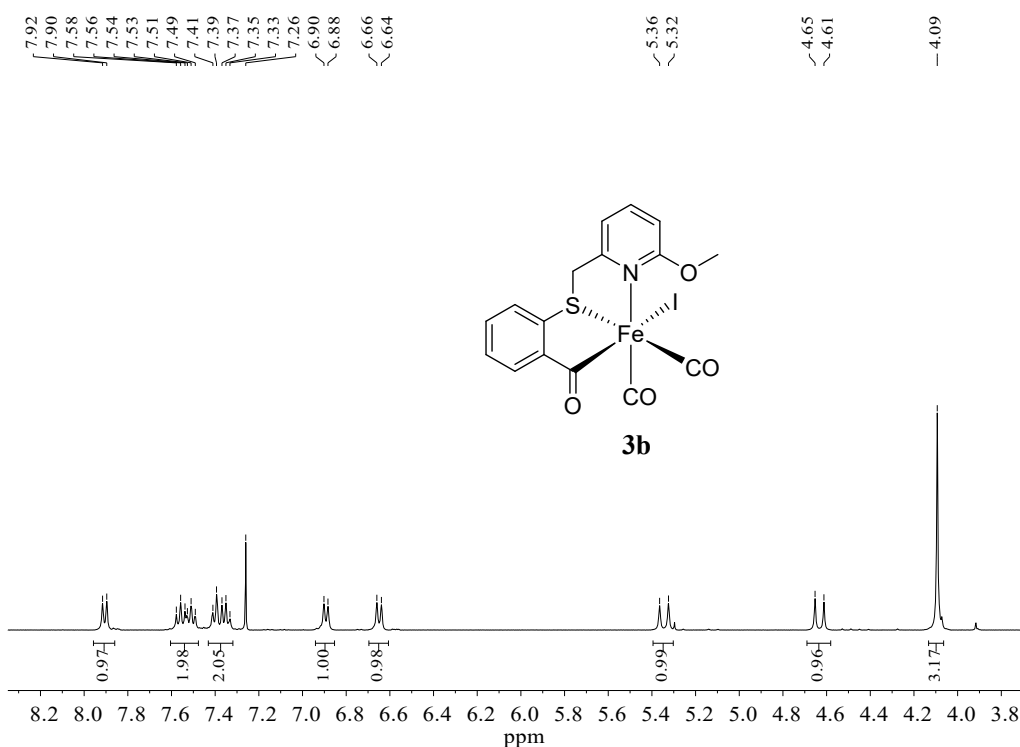



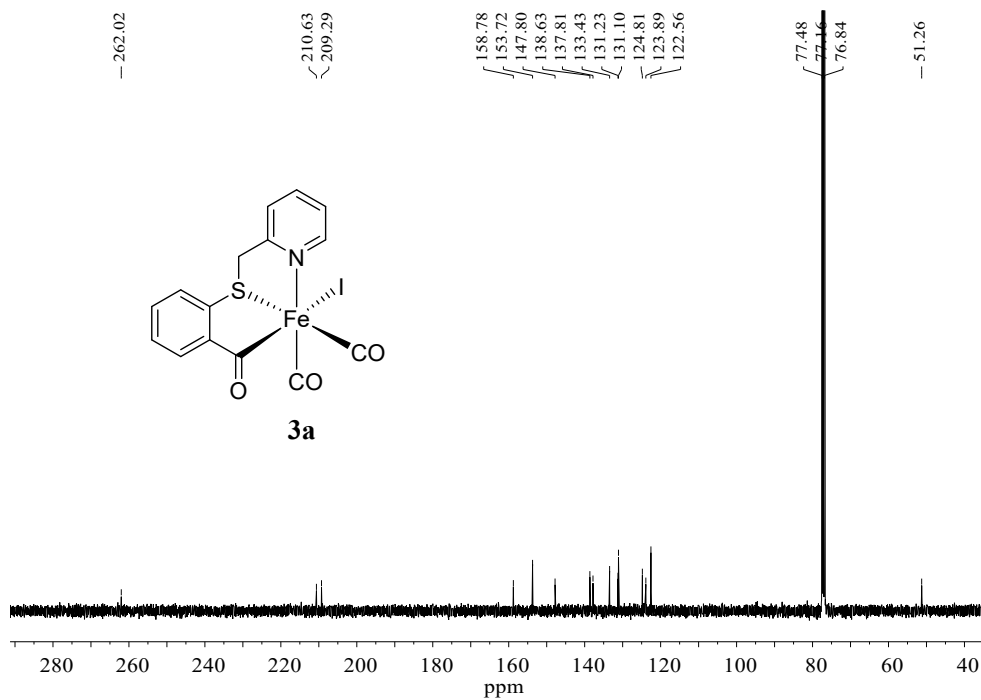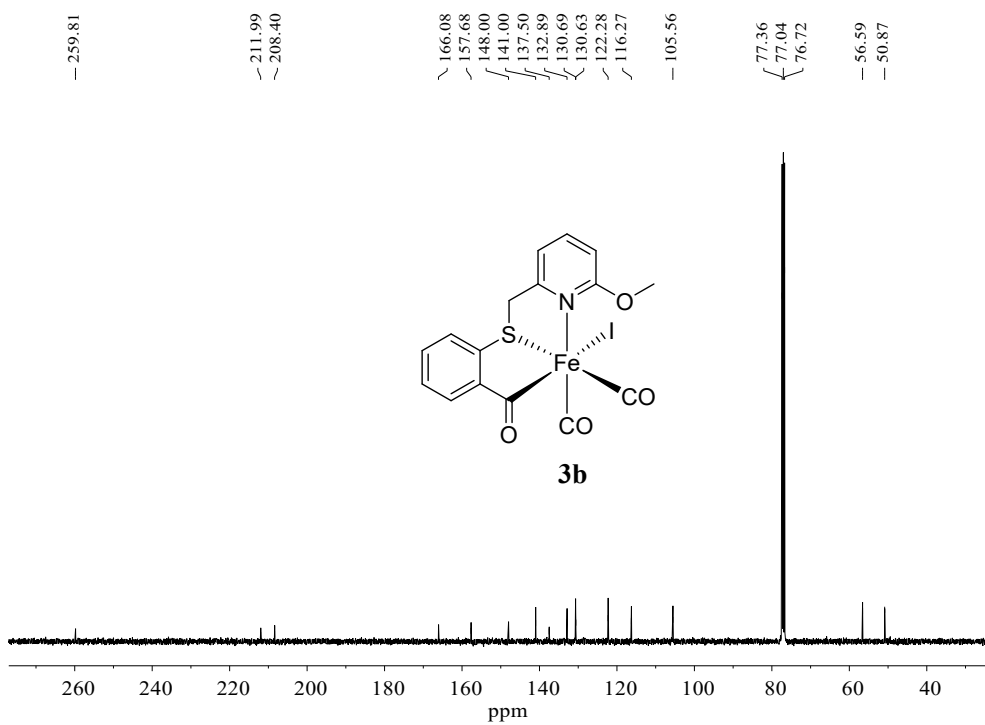

## 2. Experiments for H<sub>2</sub> Activation and Hydride Transfer Reactions

### 2.1 Product Im-H isolated from reaction of ImBF<sub>4</sub> with H<sub>2</sub> catalyzed by model **3a** or **3b** (Figure S7)

In an argon-filled glove box, a mixture of model **3a** (11.7 mg, 25  $\mu$ mol) or **3b** (12.4 mg, 25  $\mu$ mol), AgBF<sub>4</sub> (10 mg, 50  $\mu$ mol), ImBF<sub>4</sub> (77.5 mg, 250  $\mu$ mol), Et<sub>3</sub>N (35  $\mu$ L, 250  $\mu$ mol) and CHCl<sub>3</sub> (3.0 mL) was added to a 30 mL autoclave's inner sleeve (made of PTFE) containing a magnetic stir-bar. The inner sleeve was put to the autoclave and then the autoclave was sealed. After 1.0 MPa of H<sub>2</sub> was filled and released three times, the mixture was stirred under 1.0 MPa H<sub>2</sub> at room temperature for 14 h to give a grey suspension in the case of **3a** or **3b** (see Figure S7). Solvent was removed at reduced pressure to give a residue, which was subjected to silica gel column chromatography. Elution with CH<sub>2</sub>Cl<sub>2</sub>/hexane (v/v = 1:4) developed a colorless band, from which product Im-H (26.3 mg, 47% in the case of **3a** or 19.7 mg, 35% in the case of **3b**) was obtained as a white solid (note that Im-H was separated by column chromatography and monitored by thin layer chromatography (TLC) using the fluorescent TLC plates covered with silica gel GF 254 under UV irradiation). M.p. 124–125 °C (lit<sup>5</sup> 127 °C); Anal. Calcd. for C<sub>15</sub>H<sub>16</sub>N<sub>2</sub>: C, 80.32; H, 7.19; N, 12.49. Found: C, 80.37; H, 7.20; N, 12.64. <sup>1</sup>H NMR (400 MHz, CDCl<sub>3</sub>):  $\delta$  3.68 (s, 4H, NCH<sub>2</sub>CH<sub>2</sub>N), 4.69 (s, 2H, NCH<sub>2</sub>N), 6.69–7.33 (m, 10H, 2C<sub>6</sub>H<sub>5</sub>) ppm. <sup>13</sup>C{<sup>1</sup>H} NMR (100 MHz, CDCl<sub>3</sub>):  $\delta$  46.7 (s, NCH<sub>2</sub>CH<sub>2</sub>N), 66.1 (s, NCH<sub>2</sub>N), 112.7, 117.9, 129.5, 146.5 (4s, C<sub>6</sub>H<sub>5</sub>) ppm. IR (KBr disk):  $\nu$  1603, 1574, 1501, 1347, 1239, 1187, 1158, 994, 868, 744, 693 cm<sup>-1</sup>.

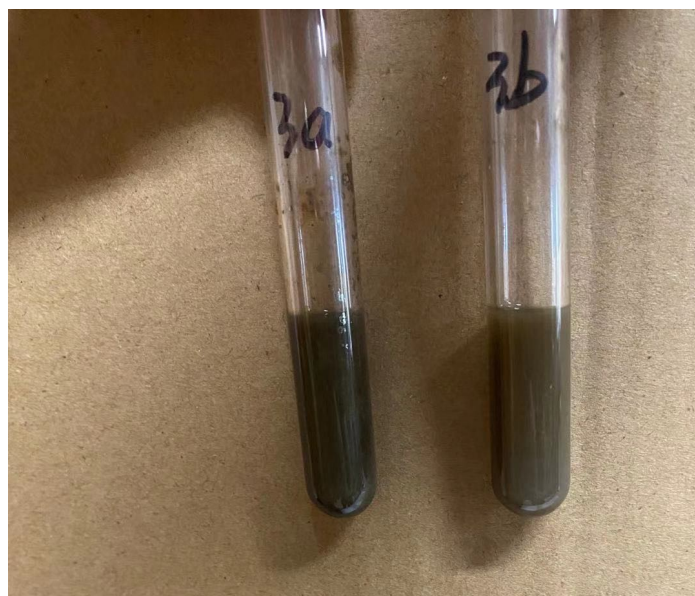

**Figure S7.** A photo showing the two grey suspensions originated in the cases of **3a,b**.

### **2.2 Reaction of ImBF<sub>4</sub> with H<sub>2</sub> catalyzed by model 3a or 3b and the *in situ* <sup>1</sup>H NMR spectra (Figures S8 and S9)**

The same reaction of ImBF<sub>4</sub> with H<sub>2</sub> in the presence of **3a** or **3b**, AgBF<sub>4</sub>, Et<sub>3</sub>N was carried out as described in 2.1 except that CHCl<sub>3</sub> was replaced by CDCl<sub>3</sub>. The resulting grey suspension originated in the case of **3a** or **3b** was filtered through a microfilter to give the corresponding yellow CDCl<sub>3</sub> solutions, which were determined *in situ* by <sup>1</sup>H NMR spectroscopy (Figures S8 and S9) to prove the formation of product Im-H and concomitant product [Et<sub>3</sub>NH]BF<sub>4</sub>.<sup>6</sup>

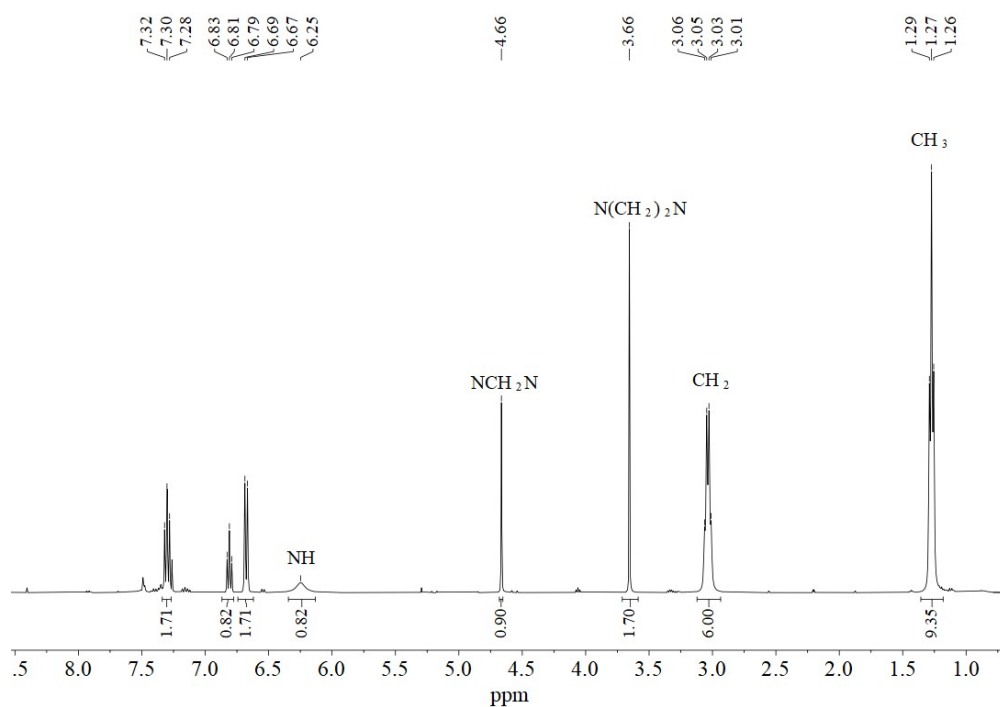

**Figure S8.** <sup>1</sup>H NMR spectrum of the resulting solution originated from reaction of ImBF<sub>4</sub> with 1.0 MPa H<sub>2</sub> catalyzed by model **3a** in the presence of AgBF<sub>4</sub> and Et<sub>3</sub>N.

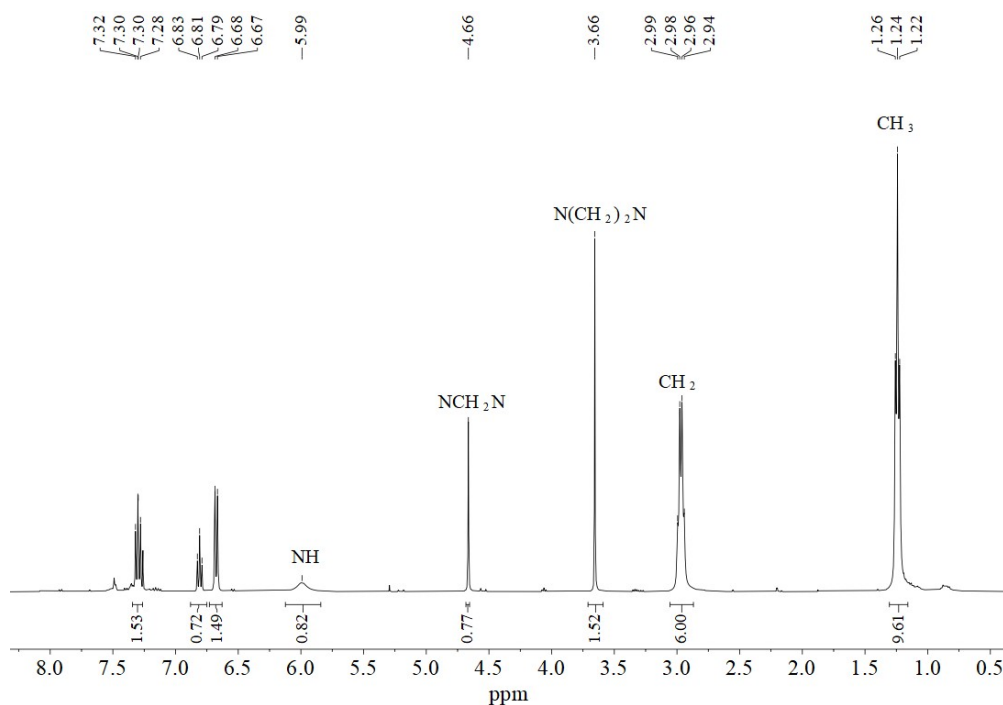

**Figure S9.** <sup>1</sup>H NMR spectrum of the resulting solution originated from reaction of ImBF<sub>4</sub> with 1.0 MPa H<sub>2</sub> catalyzed by model **3b** in the presence of AgBF<sub>4</sub> and Et<sub>3</sub>N.

### 3. Experiments for D<sub>2</sub> Activation and Deuteride Transfer Reactions

#### 3.1 Product Im-D isolated from reaction of ImBF<sub>4</sub> with D<sub>2</sub> catalyzed by model **3a** or **3b**

In an argon-filled glove box, a mixture of model **3a** (11.7 mg, 25 μmol) or **3b** (12.4 mg, 25 μmol), AgBF<sub>4</sub> (10 mg, 50 μmol), ImBF<sub>4</sub> (77.5 mg, 250 μmol), Et<sub>3</sub>N (35 μL, 250 μmol) and CHCl<sub>3</sub> (3.0 mL) was added to a 30 mL autoclave's inner sleeve containing a magnetic stir-bar. The same procedure was followed as that for the aforementioned H<sub>2</sub> activation except that 1.0 MPa H<sub>2</sub> was replaced by 1.0 MPa D<sub>2</sub>. New product Im-D (24.8 mg, 44% in the case of **3a** or 18.6 mg, 33% in the case of **3b**) was obtained as a white solid. M.p. 119–120 °C; Anal. Calcd. for C<sub>15</sub>H<sub>15</sub>DN<sub>2</sub>: C, 79.96; H, 7.60; N, 12.43. Found: C, 79.99; H, 7.43; N, 12.26. <sup>1</sup>H NMR (400 MHz, CDCl<sub>3</sub>): δ 3.67 (s, 4H, NCH<sub>2</sub>CH<sub>2</sub>N), 4.66 (s, 1H, NCHDN), 6.68–7.34 (m, 10H, 2C<sub>6</sub>H<sub>5</sub>) ppm. <sup>2</sup>H NMR (600 MHz, CHCl<sub>3</sub>): δ 4.71 (NCHDN) ppm. <sup>13</sup>C {<sup>1</sup>H} NMR (100 MHz, CDCl<sub>3</sub>): δ 46.6 (s, NCH<sub>2</sub>CH<sub>2</sub>N), 65.4, 65.6, 65.9 (3s, NCHDN), 112.5, 117.7, 129.5, 146.5 (4s, C<sub>6</sub>H<sub>5</sub>) ppm. IR (KBr disk): ν 1604, 1577, 1508, 1347, 1239, 1187, 1159, 994, 868, 744, 693 cm<sup>-1</sup>.

### 3.2 Reaction of ImBF<sub>4</sub> with D<sub>2</sub> catalyzed by model 3a or 3b and the *in situ* <sup>2</sup>H NMR spectra (Figures S10 and S11)

The same reaction of ImBF<sub>4</sub> with D<sub>2</sub> in the presence of AgBF<sub>4</sub>, Et<sub>3</sub>N was carried out as described in 3.1, except that the resulting suspension originated in the case of **3a** or **3b** was filtered through a microfilter to give the corresponding two yellow CHCl<sub>3</sub> solutions, which were determined *in situ* by <sup>2</sup>H NMR spectroscopy to prove the formation Im-D and concomitant product [Et<sub>3</sub>ND]BF<sub>4</sub>.

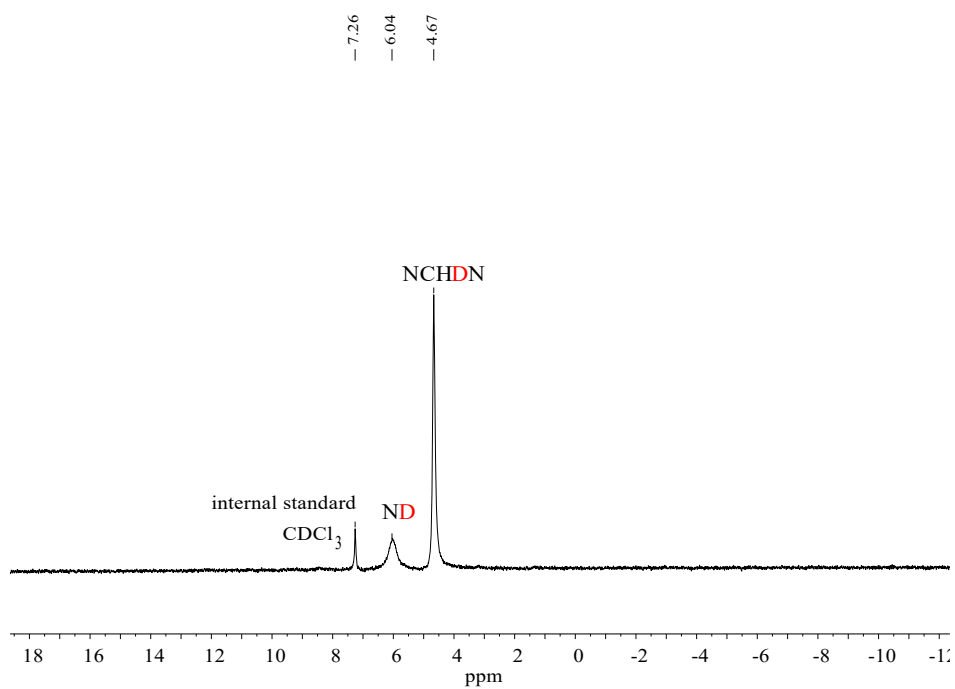

**Figure S10.**  $^2\text{H}$  NMR spectrum of the resulting  $\text{CHCl}_3$  solution originated from reaction of  $\text{ImBF}_4$  with 1.0 MPa  $\text{D}_2$  catalyzed by model **3a** in the presence of  $\text{AgBF}_4$  and  $\text{Et}_3\text{N}$ .

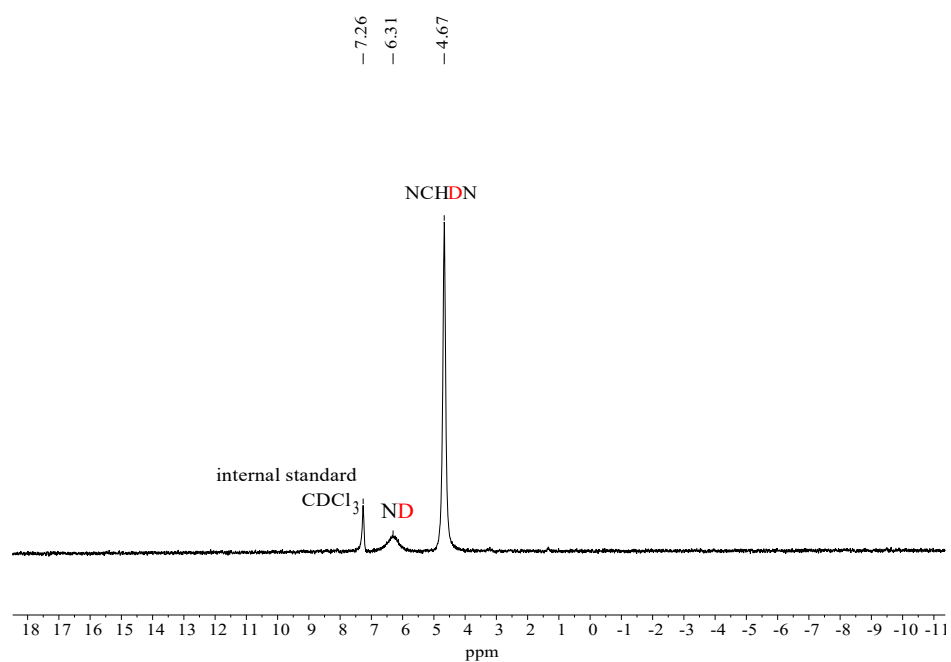

**Figure S11.**  $^2\text{H}$  NMR spectrum of the resulting  $\text{CHCl}_3$  solution originated from reaction of  $\text{ImBF}_4$  with 1.0 MPa  $\text{D}_2$  catalyzed by model **3b** in the presence of  $\text{AgBF}_4$  and  $\text{Et}_3\text{N}$ .

#### 4. *In situ* IR and <sup>1</sup>H NMR Spectra of the 5-Coordinate Intermediate $\{\eta^3\text{-[2-C(O)C}_6\text{H}_4\text{SCH}_2\text{-6-RC}_5\text{H}_3\text{N]Fe(CO)}_2\}^+$ (**M**<sub>3</sub>, R = H) Suggested in the Mechanistic Pathway

- (1) In a nitrogen-filled glove box, model **3a** (4.7 mg, 10 μmol), AgBF<sub>4</sub> (4.0 mg, 20 μmol) and 0.6 mL of CDCl<sub>3</sub> were placed in a 25 mL flask containing a magnetic stir-bar. The mixture was stirred at room temperature for 1 h and then was filtered. The IR spectrum of the resulting solution was determined in order to prove formation of the 5-coordinated cationic intermediate **M**<sub>3</sub> (R = H) (Figure S12).

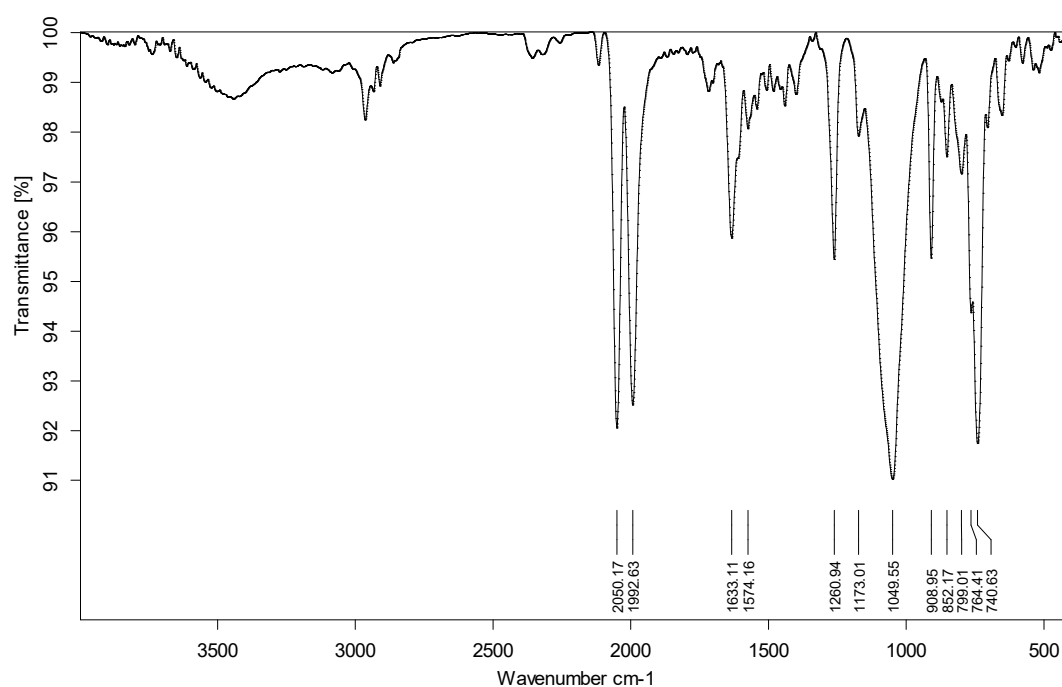

**Figure S12.** *In situ* IR spectrum of the 5-coordinate intermediate  $\{\eta^3\text{-[2-C(O)C}_6\text{H}_4\text{SCH}_2\text{-6-RC}_5\text{H}_3\text{N]Fe(CO)}_2\}^+$  (**M**<sub>3</sub>, R = H) formed from reaction of model **3a** with AgBF<sub>4</sub> in CDCl<sub>3</sub>.



(2) In a nitrogen-filled glove box, model **3a** (9.3 mg, 20  $\mu\text{mol}$ ),  $\text{AgBF}_4$  (8.0 mg, 40  $\mu\text{mol}$ ) and 0.6 mL of  $\text{CDCl}_3$  were placed in a 25 mL flask containing a magnetic stir-bar. The mixture was stirred at room temperature for 1 h and then was filtered. The  $^1\text{H}$  NMR spectrum of the resulting solution was determined in order to prove formation of the 5-coordinated cationic intermediate  $\mathbf{M}_3$  ( $\text{R} = \text{H}$ ) (Figure S13).

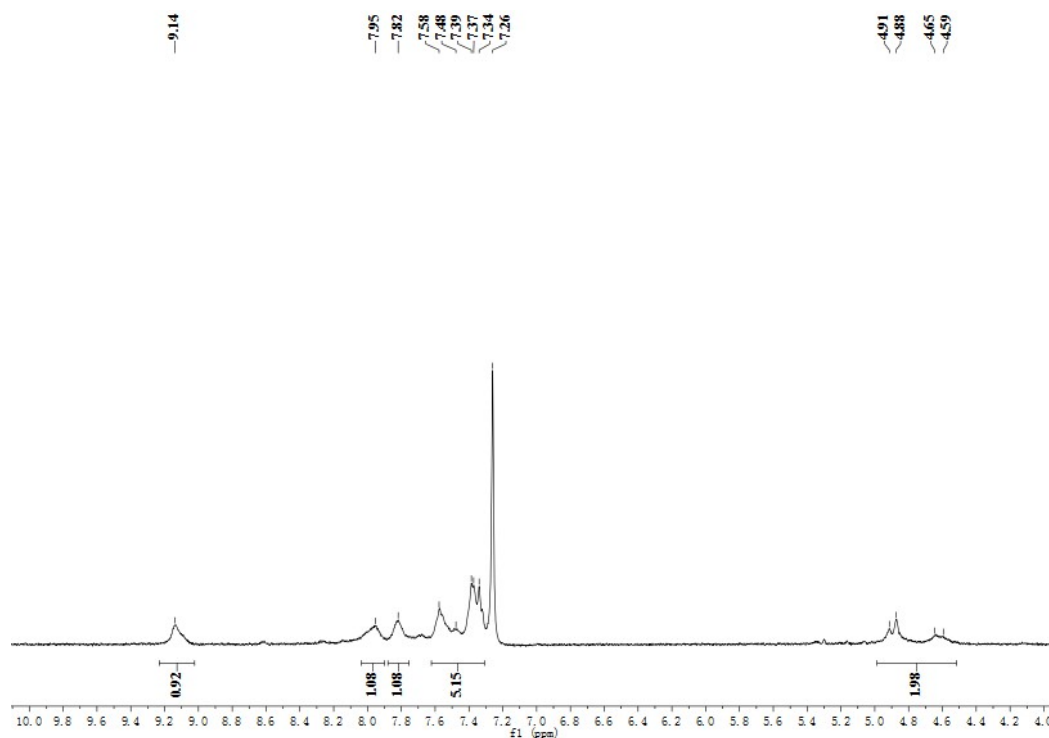

**Figure S13.** *In situ*  $^1\text{H}$  NMR spectrum of the 5-coordinate intermediate  $\{\eta^3\text{-}[2\text{-C(O)C}_6\text{H}_4\text{SCH}_2\text{-6-RC}_5\text{H}_3\text{N}]\text{Fe(CO)}_2\}^+$  ( $\mathbf{M}_3$ ,  $\text{R} = \text{H}$ ) formed from reaction of model **3a** with  $\text{AgBF}_4$  in  $\text{CDCl}_3$ .

**5. *In situ* IR Spectrum of the Fe–H Intermediate  $\eta^3$ -[2-C(O)C<sub>6</sub>H<sub>4</sub>SCH<sub>2</sub>-6-RC<sub>5</sub>H<sub>3</sub>N]Fe(CO)<sub>2</sub>H (**M**<sub>5</sub>, R = H) Suggested in the Mechanistic Pathway**

(1) In an argon-filled glove box, model **3a** (18.7 mg, 40  $\mu$ mol), AgBF<sub>4</sub> (15.6 mg, 80  $\mu$ mol), Et<sub>3</sub>N (28.0  $\mu$ L, 0.20 mmol) and 0.6 mL of CDCl<sub>3</sub> were added to a 5 mL test tube containing a magnetic stir-bar. The test tube was put to a 30 mL inner sleeve of the autoclave and then the autoclave was sealed. After 1.0 MPa of H<sub>2</sub> was filled and released three times, the mixture was stirred under 1.0 MPa H<sub>2</sub> at room temperature for 1 h. The resulting grey suspension was filtered through a microfilter to give a yellowish solution. The IR spectrum of the solution was determined in order to prove formation of the Fe–H intermediate **M**<sub>5</sub> (R = H) (Figure S14)

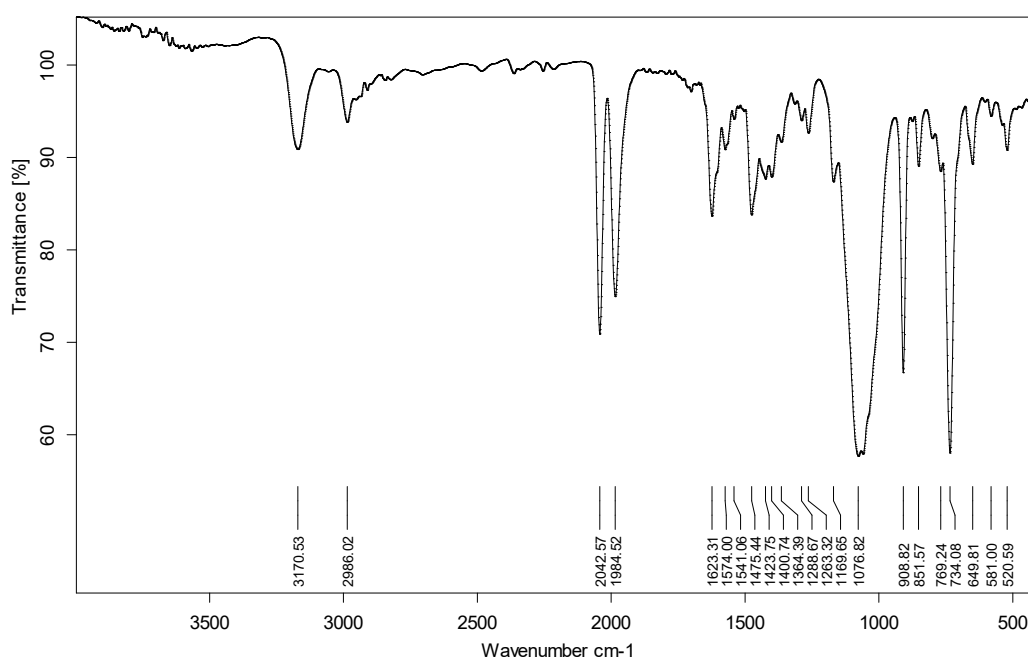

**Figure S14.** *In situ* IR spectrum of the Fe–H intermediate  $\eta^3$ -[2-C(O)C<sub>6</sub>H<sub>4</sub>SCH<sub>2</sub>-6-RC<sub>5</sub>H<sub>3</sub>N]Fe(CO)<sub>2</sub>H (**M**<sub>5</sub>, R = H) generated from reaction of model **3a** with H<sub>2</sub> in the presence of AgBF<sub>4</sub> and Et<sub>3</sub>N in CDCl<sub>3</sub>.

(2) In an argon-filled glove box, model **3a** (18.7 mg, 40  $\mu\text{mol}$ ),  $\text{AgBF}_4$  (15.6 mg, 80  $\mu\text{mol}$ ),  $\text{Et}_3\text{N}$  (28.0  $\mu\text{L}$ , 0.20 mmol) and 0.6 mL of  $\text{CDCl}_3$  were added to a 5 mL test tube containing a magnetic stir-bar. The test tube was put to a 30 mL inner sleeve of the autoclave and then the autoclave was sealed. After 1.0 MPa of  $\text{H}_2$  was filled and released three times, the mixture was stirred under 1.0 MPa  $\text{H}_2$  at room temperature for 1 h. The resulting grey suspension was filtered through a microfilter to give a yellowish solution. The  $^1\text{H}$  NMR spectrum of the solution was determined in order to prove formation of the Fe–H intermediate **M<sub>5</sub>** (R = H) (see Figure 5 in the text).

## 6. X-Ray Crystal Structure

### 6.1 Crystal structure determinations of models **3a,b**

The single crystals of **3a,b** were grown by slow evaporation of their CH<sub>2</sub>Cl<sub>2</sub>/*n*-hexane solutions at –30 °C for **3a** and at room temperature for **3b**, respectively. A single crystal of **3a** was mounted on a Bruker P4 diffractometer, whereas a single crystal of **3b** was mounted on a Rigaku-D diffractometer. The crystal data of **3a,b** were collected using a confocal monochromator with Mo K $\alpha$  radiation ( $\lambda = 0.71073$  Å) in the  $\omega$  scanning mode at 113 K. The data collection, reduction, and absorption correction were performed by the CRYSTALCLEAR program,<sup>7</sup> whereas the structures were solved by direct methods using the SHELXT program<sup>8,9</sup> and refined by full-matrix least-squares techniques (SHELXL)<sup>9</sup> on  $F^2$ . Hydrogen atoms were located by using the geometric method. Details of crystal data, data collections, and structure refinements are summarized in Table S1. CCDC 2167104 and 2167105 contain the supplementary crystallographic data of **3a,b** respectively. These data can be obtained free of charge from The Cambridge Crystallographic Data Centre via [www.ccdc.cam.ac.uk/data\\_request/cif](http://www.ccdc.cam.ac.uk/data_request/cif).

## 6.2 Crystal data and structure refinement details for models 3a,b

**Table S1.** Crystal data and structure refinement details for models **3a,b**.

|                                                       | <b>3a</b>                                                         | <b>3b</b>                                                        |
|-------------------------------------------------------|-------------------------------------------------------------------|------------------------------------------------------------------|
| mol formula                                           | C <sub>15</sub> H <sub>10</sub> FeINO <sub>3</sub> S              | C <sub>16</sub> H <sub>12</sub> FeINO <sub>4</sub> S             |
| mol wt                                                | 467.05                                                            | 497.08                                                           |
| cryst syst                                            | triclinic                                                         | orthorhombic                                                     |
| space group                                           | P-1                                                               | P2 <sub>1</sub> 2 <sub>1</sub> 2 <sub>1</sub>                    |
| <i>a</i> /Å                                           | 8.2779(17)                                                        | 7.7561(2)                                                        |
| <i>b</i> /Å                                           | 8.2797(17)                                                        | 12.2662(3)                                                       |
| <i>c</i> /Å                                           | 13.137(3)                                                         | 18.2643(6)                                                       |
| $\alpha$ /deg                                         | 91.00(3)                                                          | 90                                                               |
| $\beta$ /deg                                          | 94.52(3)                                                          | 90                                                               |
| $\gamma$ /deg                                         | 119.13(3)                                                         | 90                                                               |
| <i>V</i> /Å <sup>3</sup>                              | 782.5(3)                                                          | 1737.68(8)                                                       |
| <i>Z</i>                                              | 2                                                                 | 4                                                                |
| <i>D<sub>c</sub></i> /g·cm <sup>-3</sup>              | 1.982                                                             | 1.900                                                            |
| abs coeff/mm <sup>-1</sup>                            | 3.079                                                             | 2.784                                                            |
| <i>F</i> (000)                                        | 452                                                               | 968.0                                                            |
| index ranges                                          | -10 ≤ <i>h</i> ≤ 10<br>-10 ≤ <i>k</i> ≤ 10<br>-17 ≤ <i>l</i> ≤ 17 | -9 ≤ <i>h</i> ≤ 10<br>-16 ≤ <i>k</i> ≤ 16<br>-24 ≤ <i>l</i> ≤ 22 |
| no. of reflns                                         | 9225                                                              | 17781                                                            |
| no. of indep reflns                                   | 3661                                                              | 4507                                                             |
| 2 $\theta_{\max}$ /deg                                | 55.70                                                             | 57.398                                                           |
| Final R indexes [ <i>I</i> ≥ 2 $\sigma$ ( <i>I</i> )] | R <sub>1</sub> = 0.0400, wR <sub>2</sub> = 0.0845                 | R <sub>1</sub> = 0.0337, wR <sub>2</sub> = 0.0812                |
| Final R indexes [all data]                            | R <sub>1</sub> = 0.0473, wR <sub>2</sub> = 0.0867                 | R <sub>1</sub> = 0.0365, wR <sub>2</sub> = 0.0839                |
| GOF                                                   | 0.786                                                             | 1.070                                                            |
| largest diff peak and hole/eÅ <sup>-3</sup>           | 1.092 and -1.938                                                  | 1.566 and -1.017                                                 |

## 7. References

- 1 S. Eldin and W. P. Jencks, *J. Am. Chem. Soc.*, 1995, **117**, 4851–4857.
- 2 M. Hatazawa, N. Yoshie and H. Seino, *Inorg. Chem.*, 2017, **56**, 8087–8099.
- 3 E. N. Wayland, *Organic Syntheses*; Wiley: New York, 1988, Vol **6**, P807.
- 4 N. C. Ackroyd and J. A. Katzenellenbogen, *Organometallics*, 2010, **29**, 3669–3671.
- 5 M. K. Denk, S. Gupta, J. Brownie, S. Tajammul and A. J. Lough, *Chem. Eur. J.*, 2001, **7**, 4477–4486.
- 6 P. A. Ganeshpure, G. George and J. Das, *J. Mol. Catal. A: Chem.*, 2008, **279**, 182–186.
- 7 *CrystalClear and CrystalStructure*; Rigaku and Rigaku Americas: The Woodlands, TX, 2007.
- 8 (a) G. M. Sheldrick, *SHELXS-97 and SHELXL-97, Program for crystal structure solution and refinement*; University of Göttingen: Göttingen, Germany, 1997; (b) G. M. Sheldrick, A short history of *SHELX*. *Acta Crystallogr., Sect. A: Found. Crystallogr.*, 2008, **64**, 112–122.
- 9 G. M. Sheldrick, *SHELXT-Integrated space-group and crystal-structure determination*. *Acta Crystallogr., Sect. A: Found. Adv.*, 2015, **71**, 3–8.
